# Supplementary material
Source: PubMed Central journal article supplement (PMC6960441)
Supplement: EMBJ-39-e101928-s001.pdf [file EMBJ-39-e101928-s001.pdf]

## **Appendix Table of Contents**

1  
2  
3  
4  
5  
6  
7  
8  
9  
10  
11  
12  
13  
14  
15  
16  
17  
18  
19  
20  
21  
22

- Appendix Figure S1.**
- Appendix Figure S2.**
- Appendix Figure S3.**
- Appendix Figure S4.**
- Appendix Figure S5.**
- Appendix Figure S6.**
- Appendix Figure S7.**
- Appendix Figure S8.**
- Appendix Table S1. Primer list.**

23  
24  
25

## Appendix Figures

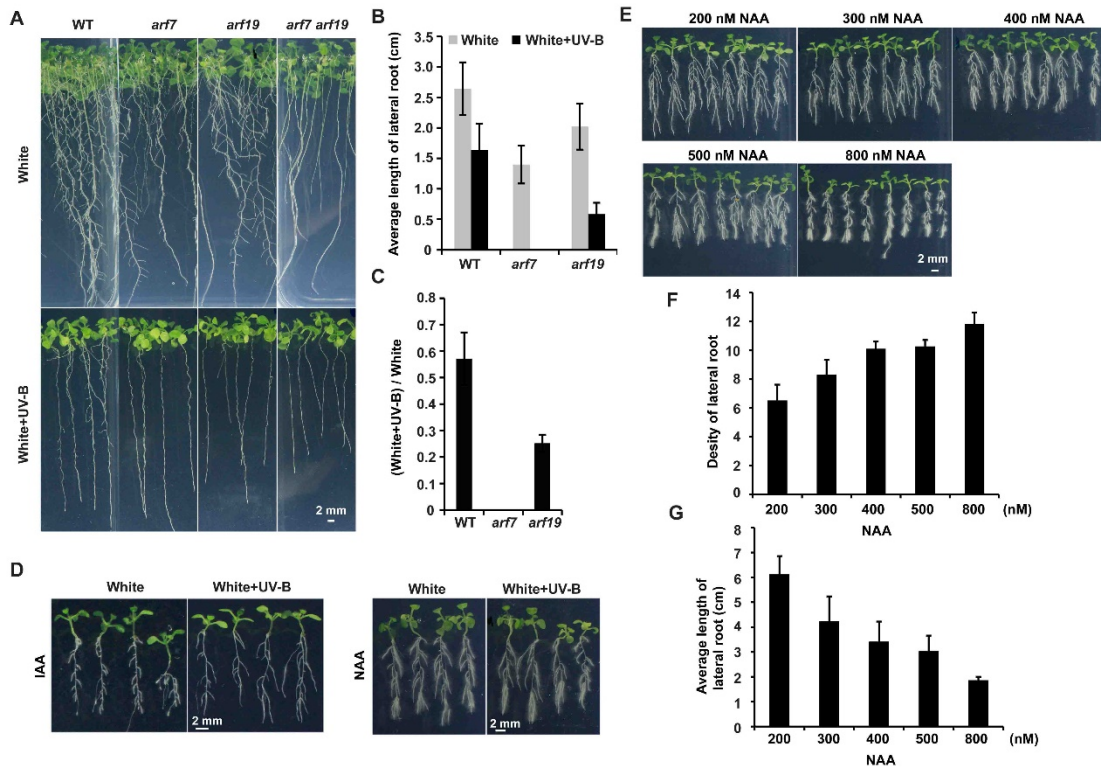

26

### 27 Appendix Figure S1. UV-B inhibits the growth of lateral root.

28 A-C. Phenotypic analysis. Seedlings of indicated genotype were grown in 1/2 MS with or  
29 without UV-B ( $1 \text{ W/m}^2$ ) for 2 weeks. Images are shown in (A); scale bar = 2 mm, and  
30 average length of lateral roots of the indicated genotypes were measured and shown in (B).  
31 SDs ( $n > 8$ ) are indicated. (C) Average lateral root length ratios (White+UV-B/White) of the  
32 quantified lateral root length in (B).

33 D. UV-B treatment breaks the function of IAA but not NAA. WT Seedlings were grown in  
34 LD for 5 days, then transferred to new plates containing  $1 \mu\text{M}$  IAA (left) or  $0.4 \mu\text{M}$  NAA  
35 (right) that were pre-irradiated by white light with or without UV-B for 7 days and kept in  
36 continuous white light for 7 days. Scale bars = 2 mm.

37 E-G. High concentration of auxin inhibits the lateral root growth. Seedlings of WT were  
38 grown in LD condition for 5 days, then transplanted to new medium with the addition of a  
39 series of concentrations of NAA and kept in continuous white condition for 7 days. Images  
40 are shown in (E); scale bar = 2 mm. The lateral root density (number of lateral roots/length of  
41 primary root) (F) and average length of lateral roots (G) of the indicated genotypes were

42 measured and shown in F, G. SDs ( $n > 8$ ) are indicated.

43

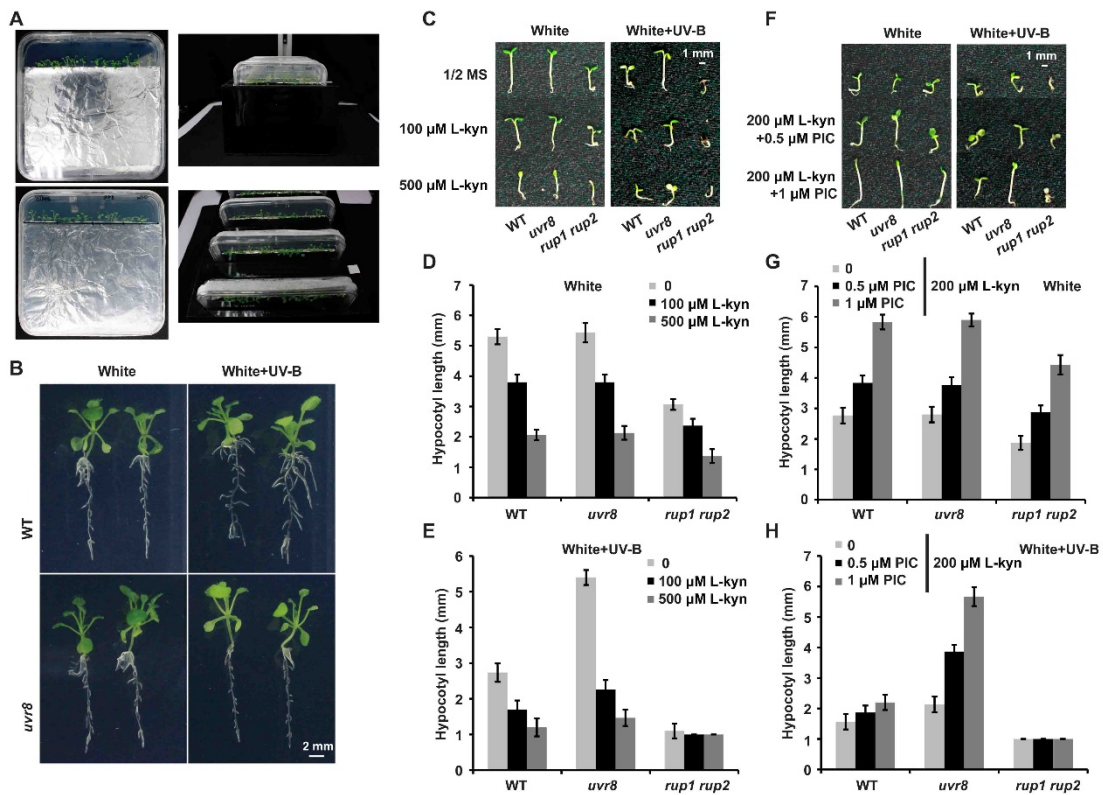

44

45

46 **Appendix Figure S2. UV-B represses the auxin responses to inhibit the hypocotyl**  
47 **elongation in a UVR8-dependent manner.**

48 A. Images showing details of the covering root experiment.

49 B. Phenotypic analysis. Seedlings of WT and *uvr8* were grown in LD condition for 5 days,  
50 then transplanted to new medium containing 0.4  $\mu$ M NAA and roots were covered, then kept  
51 in white or white plus UV-B light condition (1 W/m<sup>2</sup>) for 10 days. Scale bar = 2 mm.

52 C-E. Phenotypic analysis. Seedlings of the indicated genotypes were grown in 1/2 MS with or  
53 without L-kyn (the inhibitor of auxin synthesis) in continuous white light condition and white  
54 plus UV-B (2 W/m<sup>2</sup>) light condition. Images of the representative seedlings are shown in (C);  
55 scale bar = 1 mm. And the hypocotyl lengths of the indicated genotypes were measured and  
56 are shown in (D) and (E). Standard deviations ( $n > 15$ ) are indicated.

57 F-H. *uvr8* mutant is hypersensitive but *rup1 rup2* is insensitive to PIC (auxin analogous)  
58 under UV-B condition. WT, *uvr8* and *rup1 rup2* were grown in 1/2 MS with 200  $\mu$ M L-kyn,

59 and with the addition of a series of concentrations of PIC in the continuous white light  
 60 condition or white plus UV-B (2 W/m<sup>2</sup>) light condition for 6 d. Images of the representative  
 61 seedlings are shown in (F); scale bar = 1 mm. The hypocotyl lengths of the indicated  
 62 genotypes were measured and are shown in (G) and (H). Standard deviations (n > 15) are  
 63 indicated.

64  
 65

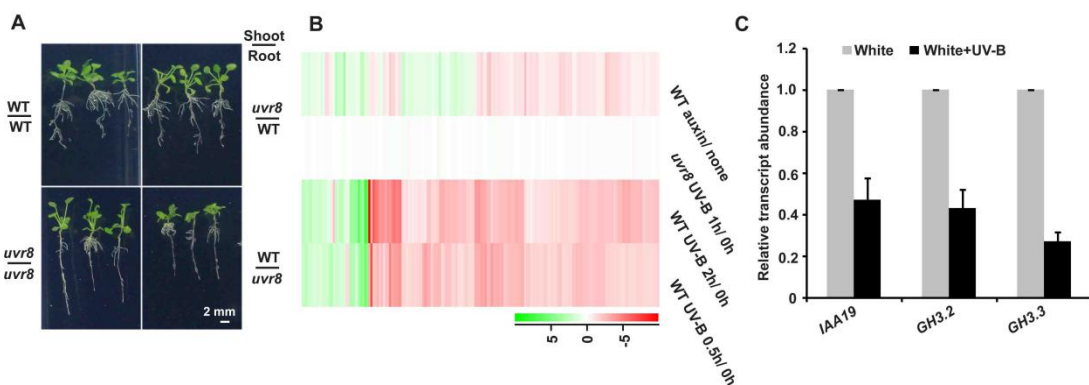

66

67 **Appendix Figure S3. UVR8 inhibits auxin responses in a tissue-autonomous manner.**

68 A. UVR8 inhibited auxin responses under UV-B in a root-autonomous way. WT and *uvr8*  
 69 seedlings grown in LD for 5 days were used for reciprocal grafting. Seedlings were kept in  
 70 LD for 7 days after grafting, then transplanted to new medium containing 0.4 μM NAA and  
 71 covered the roots and kept in white plus UV-B light for 10 days. Scale bar=2 mm.

72 B. Transcriptome analysis of genes expression regulated by auxin, UV-B and UVR8. WT/  
 73 UV-B 0.5 h and WT/ UV-B 2 h showed the transcriptome of roots and only one biological  
 74 replicate was analyzed. The *uvr8*/ UV-B 1 h and WT auxin/ none showed the transcriptome of  
 75 seedlings and three biological replicates were analyzed. The parameter measured by color key  
 76 shows the Log-fold change.

77 C. qPCR assay showing that UV-B inhibits the expression of auxin-signaling genes. WT  
 78 protoplast were kept in white light condition or white light plus UV-B condition for 16h. The  
 79 *ACT7* gene was analyzed as an internal control. Error bars are SD of three biological  
 80 replicates.

81

82

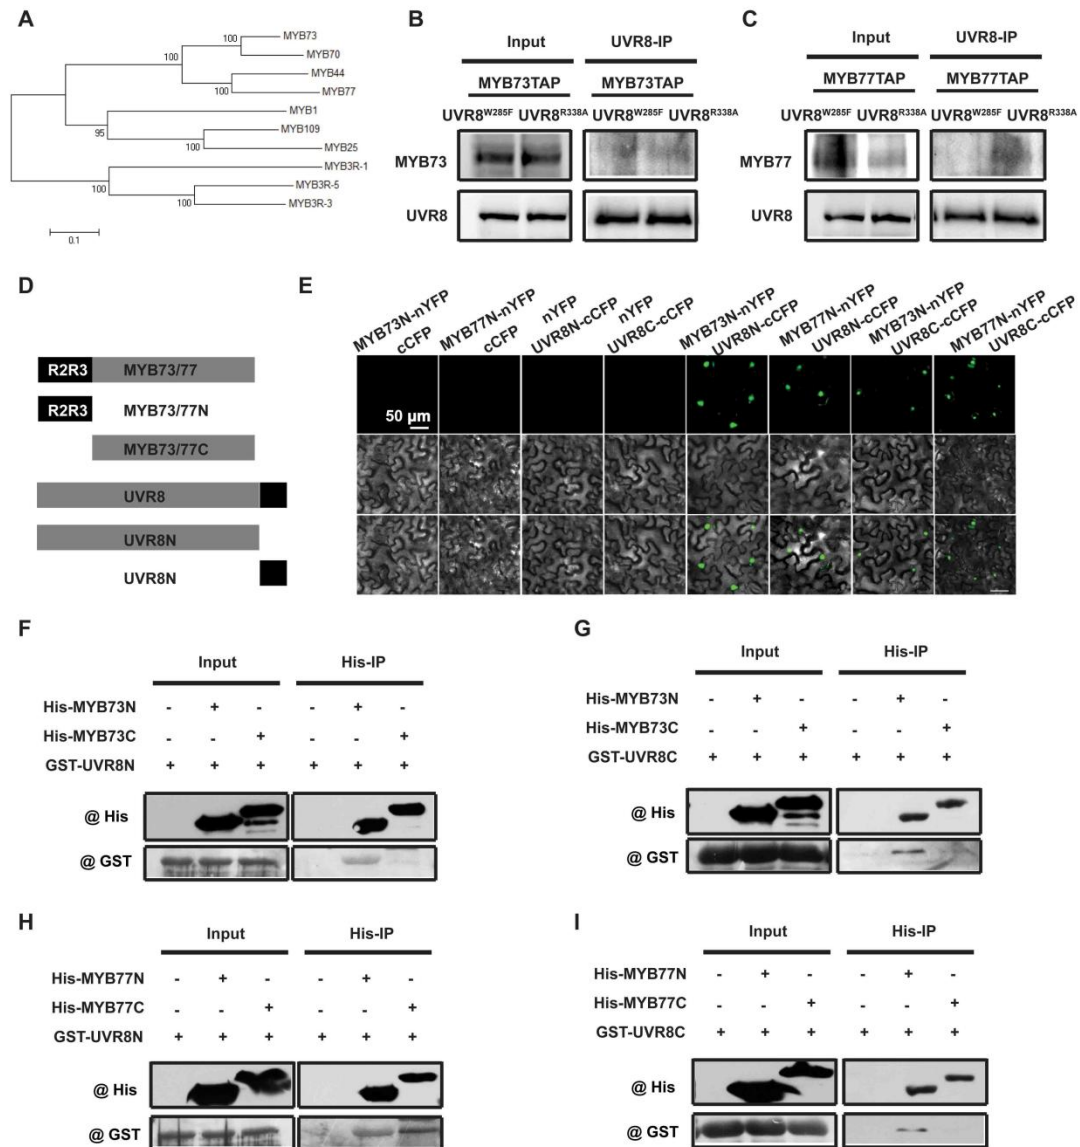

83

84

85 **Appendix Figure S4. UVR8 physically interacts with the R2R3 DNA-binding domain of**  
 86 **MYB73/MYB77.**

87 A. Neighbor-joining phylogenetic analysis and alignment of amino acid sequence showing  
 88 possible relationship between MYB73 and other MYB proteins. The bootstrap values are  
 89 indicated. The scale bar indicates substitution per site.

90 B and C. Co-IP assays showing that the interaction between UVR8<sup>R338A</sup> and MYB73  
 91 (B)/MYB77(C) is stronger than that between GR-UVR8<sup>W285F</sup> and MYB73/MYB77. 14-  
 92 day-old transgenic seedlings expressing 35S::MYB73-TAP/GR-UVR8<sup>W285F</sup> ,  
 93 35S::MYB77-TAP/GR-UVR8<sup>W285F</sup> , 35S::MYB73-TAP/GR-UVR8<sup>R338A</sup> , and

94 35S::MYB73-TAP/GR-UVR8<sup>R338A</sup> grown in 1/2 MS with 20 μM DEX in long day condition  
 95 were moved to UV-B (1 W/m<sup>2</sup>) for 20 min. Total proteins were extracted and used in the  
 96 co-IP assay. Input: immunoblots showing the levels of UVR8, MYB73-TAP/MYB77-TAP in  
 97 the total protein extract. UVR8-IP: the IP products precipitated by the anti-UVR8 antibody.  
 98 Total proteins (Input) or IP products were probed, in immunoblots with antibodies to UVR8  
 99 or Myc.

100 D. Schematic representation of MYB73/MYB77 and UVR8 used in this work.  
 101 MYB73/MYB77 contains a R2R3 domain and a C terminal. UVR8 contains seven repeats of  
 102 a β-propeller fragment and a C terminal (including C27 domain).

103 E. BiFC assays showing that both of UVR8N and UVR8C interact with the R2R3 DNA-  
 104 binding domain of MYB73/MYB77.

105 F and G. pull-down assays showing that R2R3 domain of MYB73 could bind the N terminal  
 106 (F) and C terminal (G) of UVR8.

107 H and I. Pull-down assays showing that both the R2R3 domain and the C terminal of MYB77  
 108 could interact with the N terminal of UVR8 (H), but only the R2R3 domain of MYB77 could  
 109 bind the C terminal of UVR8 (I).

110  
 111  
 112

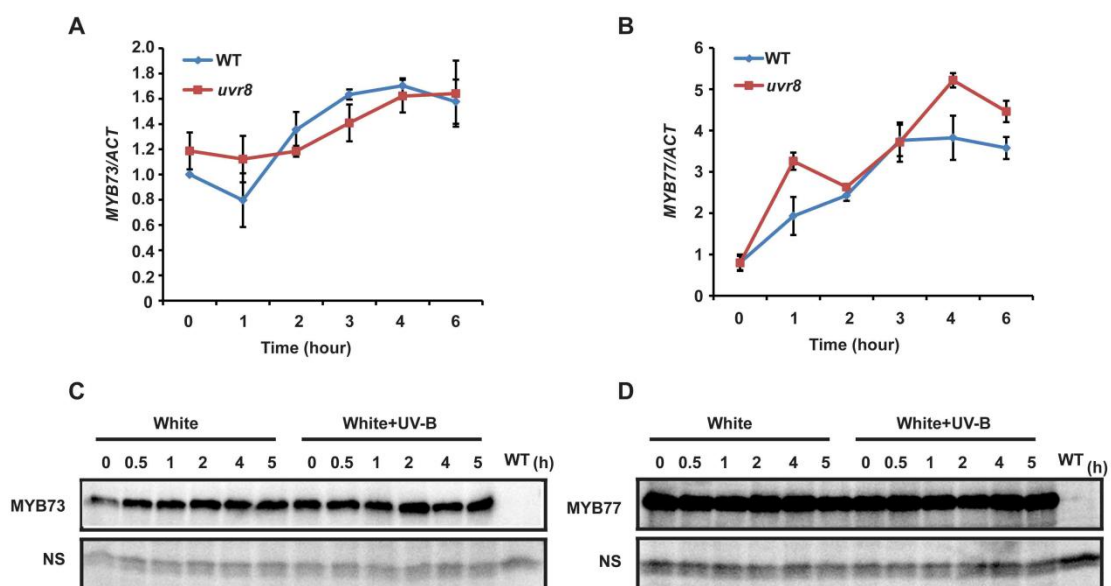

113  
 114

115 **Appendix Figure S5. UV-B slightly induces the transcription of *MYB73*/*MYB77* but does**  
 116 **not affect their protein stability.**

117 A and B. qPCR assays showing that UV-B slightly induces the expression of *MYB73* (A) and  
 118 *MYB77* (B) in a *UVR8*-independent manner. 6-d-old seedlings grown in constant white light  
 119 were transferred to UV-B for the indicated time. The *ACT7* gene was analyzed as an internal  
 120 control. Error bars are SD of three biological replicates.

121 C and D. Immunoblots showing that the lack of UV-B effects on the abundance of the  
 122 *MYB73*(C) /*MYB77*(D) protein. Transgenic plants expressing *35S:MYB73-TAP* or  
 123 *35S::MYB77-TAP* plants were grown in 22°C continuous white light condition for 6 days, and  
 124 kept in white light or transferred to white plus UV-B light for a 5-h time course. Samples  
 125 were fractionated by 10% SDS-PAGE, blotted, and probed with the anti-MYC antibody. NS  
 126 (non-specific band).

127

128

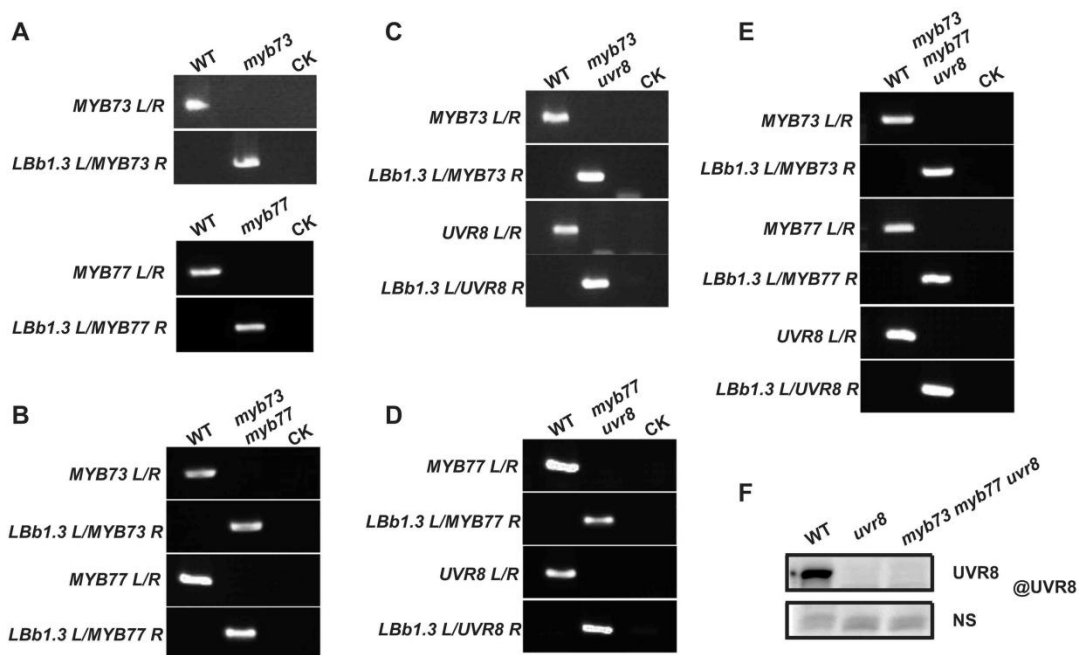

129

130

131 **Appendix Figure S6. Genotyping of mutants**

132 A-E. PCR results show the genotyping of the indicated mutants. Primers used in the PCR  
 133 reaction are labeled in the left. CK (control: without DNA template).



134 F. Immunoblots show UVR8 in indicated genotypes. Samples were fractionated by 10%  
 135 SDS-PAGE, blotted, and probed with the anti-UVR8 antibody. NS (non-specific band).  
 136

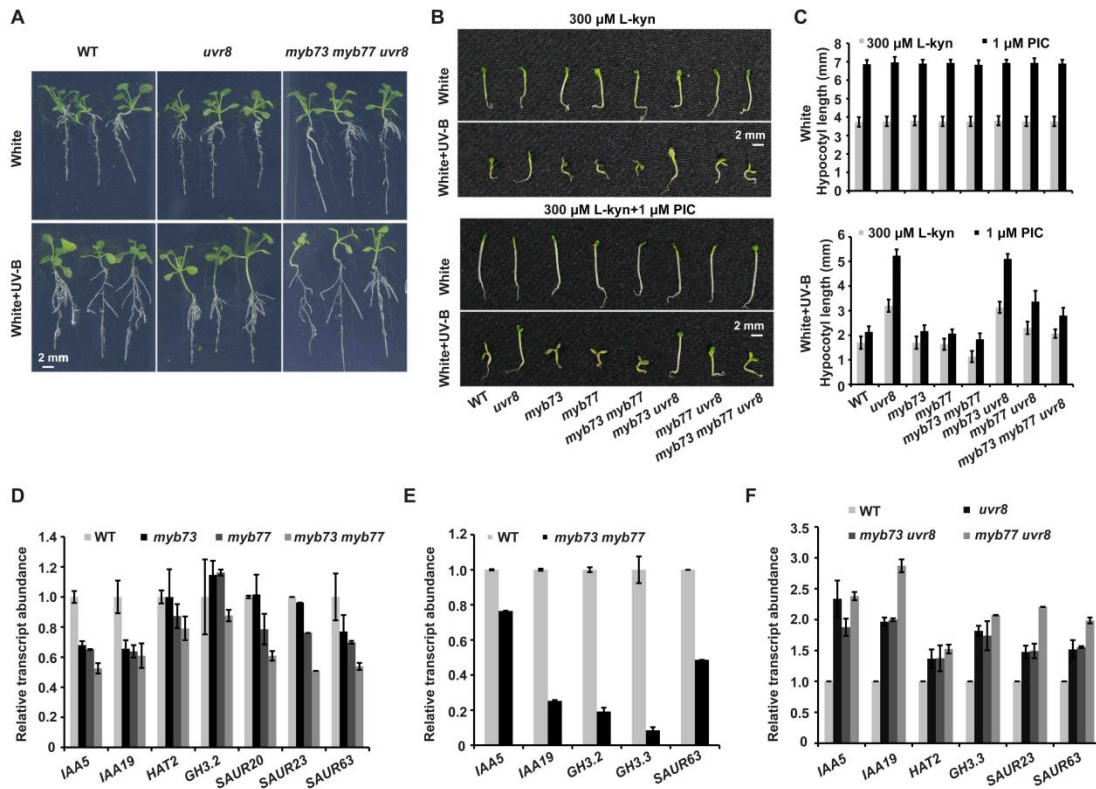

137

138

139 **Appendix Figure S7. MYB73/MYB77 work redundantly to mediate UVR8-controlled**  
 140 **auxin responses.**

141 A. *myb73 myb77 uvr8* can partially rescue the phenotype of *uvr8*. Seedlings of indicated  
 142 genotypes were grown in LD condition for 5 days, then transplanted to new medium  
 143 containing 0.4  $\mu$ M NAA and roots were covered, then kept in continuous white or white light  
 144 plus UV-B condition for 10 days; scale bar = 2 mm.

145 B and C. MYB73/MYB77 acts downstream of UVR8 to mediate UV-B signaling. Seedlings  
 146 of the indicated genotypes were grown in continuous white light or white plus UV-B light for  
 147 6d, Images of representative seedlings are shown in (B); scale bars = 2 mm. The hypocotyl  
 148 lengths of the indicated genotypes were measured and shown in (C). Standard deviations (n >  
 149 15) are indicated.

150 D. Quantitative RT-PCR analyses of auxin-signaling genes expression in wild type (Col-0),



151 *myb73*, *myb77* and *myb73myb77*. Seedlings were grown in continuous white light for 5 days,  
 152 then transferred to UV-B for 1 day with addition of 1  $\mu$ M IAA. Error bars are SD of three  
 153 biological replicates.

154 E. qPCR assay analyses the expression of indicated genes in WT and *myb73myb77*. WT and  
 155 *myb73 myb77* protoplasts were kept in white plus UV-B light condition for 16 h. *ACT7* gene  
 156 was analyzed as an internal control. Error bars are SD of three biological replicates.

157 F. Quantitative RT-PCR analyses of genes expression of *MYB73/MYB77* target genes. 5-d-old  
 158 seedlings grown in continuous white light were transferred to UV-B and treated with 1  $\mu$ M  
 159 IAA for 1d. Error bars are SD of three biological replicates.

160

161

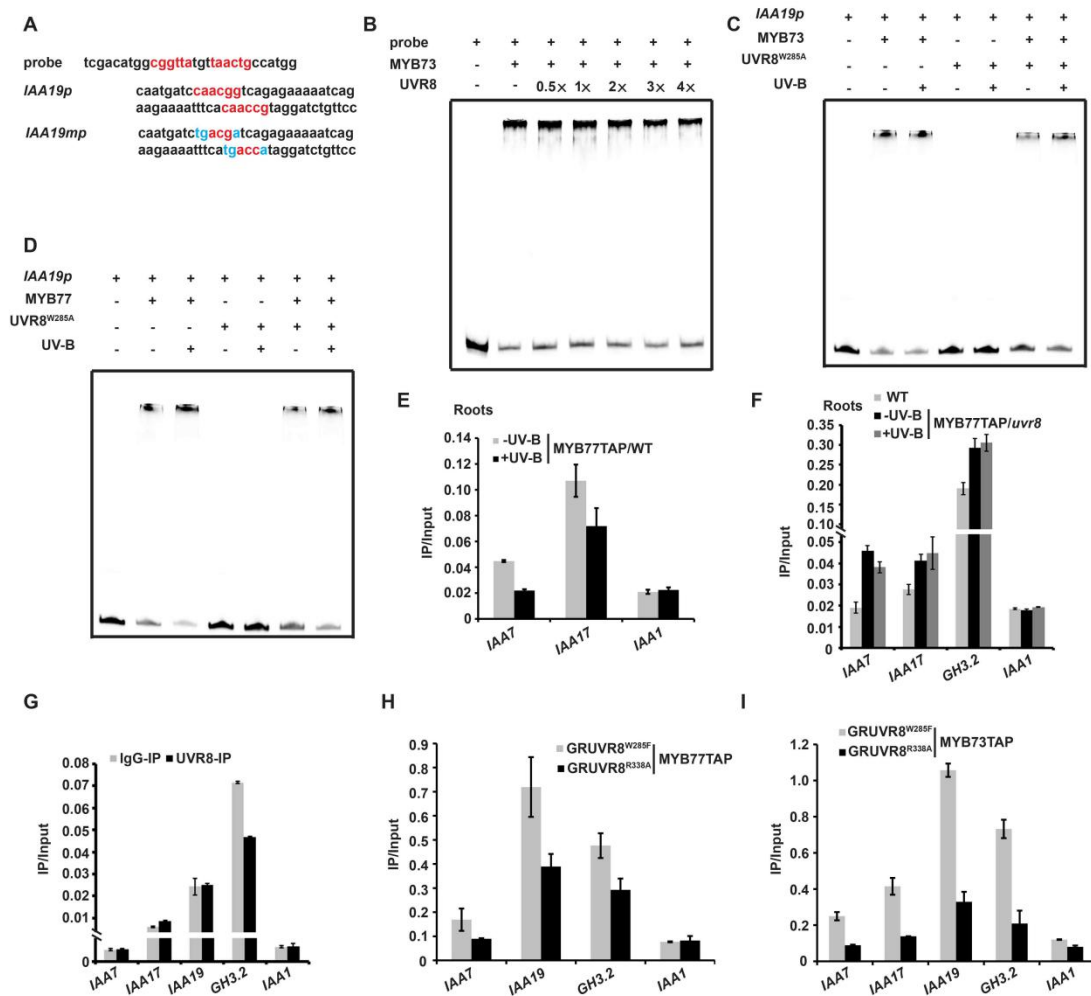

162

163

164 **Appendix Figure S8. UV-B inhibits the DNA-binding activity of MYB73/MYB77 in a**

165 **UVR8-dependent manner.**

166 A. DNA sequences of the probe including the MBSI motif. The *IAA19p* is the wild-type

167 *IAA19* promoter contained MBSI (*IAA19p*) and mutated MBSI (*IAA19mp*) was used as

168 competitor. Red represents the MBSI and the blue represents the mutated nucleotides.

169 B. EMSA showing that UVR8 has a strong effect on inhibiting MYB73 to bind DNA under

170 UV-B. MYB73 and UVR8 protein were expressed and purified from *E.coli*. The reaction

171 mixture was treated with UV-B light for 30 min.

172 C and D. EMSA results showing that UVR8<sup>W285A</sup> inhibits the MYB73 (C) and MYB77 (D) to

173 bind the promoter of *IAA19* in vitro.

174 E and F. ChIP-qPCR showing that UV-B inhibits the DNA-binding activity of MYB77 (E) in

175 roots in a UVR8-dependent manner (F). ChIP-qPCR assays were performed using transgenic

176 seedlings expressing *35S::MYB77-TAP/WT* or *35S::MYB77-TAP/uvr8*, which were treated

177 with or without UV-B for 5 hours before harvesting samples. Chromatin fragments (~500bp)

178 were immunoprecipitated by anti-Myc antibody, and the precipitated DNA was analyzed by

179 qPCR using the primer pairs indicated. The IP/Input ratios are shown with SDs (n=3).

180 G. ChIP-qPCR showing that UVR8 cannot bind the promoters of MYB73/MYB77 target

181 genes. The IP/Input ratios are shown with SDs (n=3).

182 H and I. ChIP-qPCR results show monomeric UVR8 (UVR8<sup>R338A</sup>) can strongly inhibit the

183 DNA-binding activity of MYB77(H)/MYB73(I). The IP/Input ratios are shown with SDs

184 (n=3).

185

186

187 **Table S1. Primer list**

188

|                 |                         |
|-----------------|-------------------------|
| <i>myb73</i> -F | AGAGAGTGGAAAGAAACGCTCC  |
| <i>myb73</i> -R | CCTCCGGAGATAGCTGGTTAC   |
| <i>myb77</i> -F | GATGAGCAGCTACGAAGGATG   |
| <i>myb77</i> -R | TGGTTATGAATCACCAAAACAAG |
| MYB73q-F        | GAGGAGTTACATGGCGGATT    |
| MYB73q-R        | CTTTGTGGCATAACGAACC     |
| MYB77q-F        | TAAGGCGGAAGTGAGGAGTT    |
| MYB77q-R        | TCCAATTTGACTCATCGGAA    |

|                  |                                                               |
|------------------|---------------------------------------------------------------|
| MYB73nYFP/nLUC-F | GGGGACAAGTTTGTACAAAAAAGCAGGCTTC<br>ATGTCAAACCCGACCCGTAAG      |
| MYB73nYFP/nLUC-R | GGGGACCACTTTGTACAAGAAAGCTGGGTCCTCCATCTTC<br>CCAATTCCGAT       |
| MYB77nYFP/nLUC-F | GGGGACAAGTTTGTACAAAAAAGCAGGCTTCATGGCGGA<br>TCGTGTAAAGGT       |
| MYB77nYFP/nLUC-R | GGGGACCACTTTGTACAAGAAAGCTGG<br>GTCCTCAACCTTAGGTGTTACTACTCCA   |
| MYB70-nLUC-F     | GGGGACAAGTTTGTACAAAAAAGCAGGCTTCATGTCTGG<br>TTCGACCCGGA        |
| MYB70-nLUC-R     | GGGGACCACTTTGTACAAGAAAGCTGGGTCCTCGATCCTA<br>CCTAATCCAATAAA    |
| MYB44-nLUC-F     | GGGGACAAGTTTGTACAAAAAAGCAGGCTTCATGGCTGA<br>TAGGATCAAAGGTCC    |
| MYB44-nLUC-R     | GGGGACCACTTTGTACAAGAAAGCTGGGTCCTCGATTCTC<br>CCAATCCAAT        |
| MYB73pCold-F     | CCGCTCGAGATGTCAAACCCGACCCGTAAG                                |
| MYB73pCold-R     | GGAATTCCTACTCCATCTTCCAATTCCG                                  |
| MYB77pCold-F     | CCGCTCGAGATGGCGGATCGTGTAAAGGT                                 |
| MYB77pCold-R     | GGAATTCCTACTCAACCTTAGGTGTTACTACTCCA                           |
| MYB73N-nYFP-F    | GGGGACAAGTTTGTACAAAAAAGCAGGCTTC<br>ATGTCAAACCCGACCCGTAAG      |
| MYB73N-nYFP-R    | GGGGACCACTTTGTACAAGAAAGCTGGGTCACCTTGCCT<br>TCGACGCTG          |
| MYB73C-nYFP-F    | GGGGACAAGTTTGTACAAAAAAGCAGGCTTCATGTGTGA<br>TTTTGGTGGTAATGGAGG |
| MYB73C-nYFP-R    | GGGGACCACTTTGTACAAGAAAGCTGGGTCCTCCATCTTC<br>CCAATTCCGAT       |
| MYB77N-nYFP-F    | GGGGACAAGTTTGTACAAAAAAGCAGGCTTCATGGCGGA<br>TCGTGTAAAGGT       |
| MYB77N-nYFP-R    | GGGGACCACTTTGTACAAGAAAGCTGGGTCCTCCGTCTCC<br>GTCACCGTC         |
| MYB77C-nYFP-F    | GGGGACAAGTTTGTACAAAAAAGCAGGCTTC<br>ATGGAAGATCAGGATCGGCCGA     |
| MYB77C-nYFP-R    | GGGGACCACTTTGTACAAGAAAGCTGG<br>GTCCTCAACCTTAGGTGTTACTACTCCA   |
| MYB73N-pCold-F   | CCGCTCGAGATGTCAAACCCGACCCGTAAG                                |
| MYB73N-pColdR    | GGAATTCCTAACTTTGCCCTTCGACGCTG                                 |
| MYB73C-pCold-F   | CCGCTCGAGATGTGTGATTTTGGTGGTAATGGAGG                           |
| MYB73C-pCold-R   | GGAATTCCTACTCCATCTTCCAATTCCG                                  |
| MYB77N-pCold-F   | CCGCTCGAGATGGCGGATCGTGTAAAGGT                                 |

|                |                                                                   |
|----------------|-------------------------------------------------------------------|
| MYB77N-pCold-R | GGAATTCCTACTCCGTCTCCGTCACCGTC                                     |
| MYB77C-pCold-F | CCGCTCGAGATGGAAGATCAGGATCGGCCGA                                   |
| MYB77C-pCold-R | GGAATTCCTACTCAACCTTAGGTGTTATTACTCCA                               |
| MYB73-TAP-F    | TAGTTAATTAATGTCAAACCCGACCCGTAA                                    |
| MYB73-TAP-R    | CGAGGCGCGCCACTCCATCTTCCCAATTCCGAT                                 |
| MYB77-TAP-F    | TAGTTAATTAATGGCGGATCGTGTTAAAGG                                    |
| MYB77-TAP-R    | CGAGGCGCGCCACTCAACCTTAGGTGTTATTACTCCACA                           |
| IAA5q-F        | AGAAAGAACAGTCTCGAACGGAC                                           |
| IAA5q-R        | AGAATTTGCAGAGCGGAAGC                                              |
| SAUR20q-F      | CTTGAATCTTTTCATACATCTTCAGAAG                                      |
| SAUR20q-R      | TAACTAGGAAGAAAAATGTTGGCTCA                                        |
| SAUR23q-F      | ATTCAAACTTTCAGACAAAAGAAATGG                                       |
| SAUR23q-R      | ACAAGGAAACAACCTCTATCTCTAACT                                       |
| SAUR63q-F      | GTGTCTTTACTAGCAGCTCTTCTACTGT                                      |
| SAUR63q-R      | GTGATTGGTCCTTCCGTTGG                                              |
| HAT2q-F        | AACCATCACCACAATCACAGGC                                            |
| HAT2q-R        | CATCCAAAATTACAATGACCCCA                                           |
| IAA19q-F       | GATAAGCTCTTCGGTTTCCG                                              |
| IAA19q-R       | TCGCAGTTGTCACCATCTTT                                              |
| GH3.2q-F       | CCTCTTCAATCTCGGATGGT                                              |
| GH3.2q-R       | GTCAGGGTTCCGAGTCATTT                                              |
| GH3.3q-F       | TTGTCCAGACTCATCCCAA                                               |
| GH3.3q-R       | CTTCGTGACGCATAAGGAGA                                              |
| MBSI-F         | TCGACATGGCGGTTATGTAACTGCCATGG                                     |
| MBSI-R         | CCATGGCAGTTAACATAACCGCCATGTCGA                                    |
| IAA19p-EMSA-F  | CAATGATCCAACGGTCAGAGAAAAATCAGAAGAAAATTT<br>CACAACCGTAGGATCTGTTCC  |
| IAA19p-EMSA-R  | GGAACAGATCCTACGGTTGTGAAATTTTCTTCTGATTTTTTC<br>TCTGACCGTTGGATCATTG |
| IAA19pm-EMSA-F | CAATGATCTGACGATCAGAGAAAAATCAGAAGAAAATTT<br>CATGACCATAGGATCTGTTCC  |
| IAA19pm-EMSA-R | GGAACAGATCCTATGGTCATGAAATTTTCTTCTGATTTTTTC<br>TCTGATCGTCAGATCATTG |
| IAA1ChIP-F     | TAGAAGGACGAAGGTCGAGAAGTT                                          |
| IAA1ChIP-R     | TACTTTAACGGAGAAGCTCTCTTCC                                         |
| IAA7ChIP-F     | AAACATCACTACCACGTAAGTGTG                                          |
| IAA7ChIP-R     | TTTTCTTCATTGGTGGGGTTTAT                                           |
| IAA17ChIP-F    | GCTTCGAATGTGTTTCATAATTCAC                                         |
| IAA17ChIP-R    | AGCCCTTTGATTAAGTCATCATCC                                          |
| IAA19ChIP-F    | CATGGGATGTTAGGAGAAGGAGAT                                          |

|             |                            |
|-------------|----------------------------|
| IAA19ChIP-R | TGTTATTCAGTTTGTGTGGGGAG    |
| GH3.2ChIP-F | CGTTGATTA ACTTAAAGTCACTCCG |
| GH3.2ChIP-R | TGTCACAGGGTTGTAGCCGAG      |
