# Supplementary material
Source: PubMed Central journal article supplement (PMC6960441)

**Fig 5A**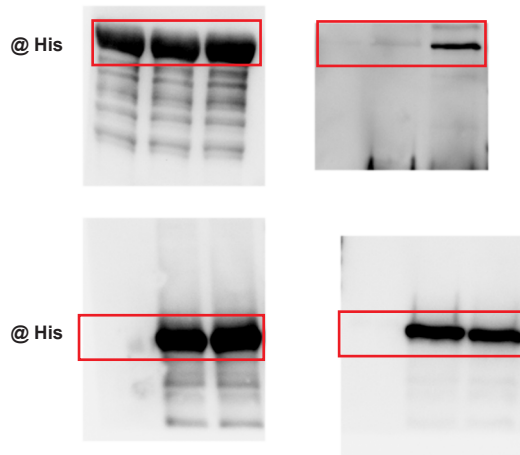**Fig 5B**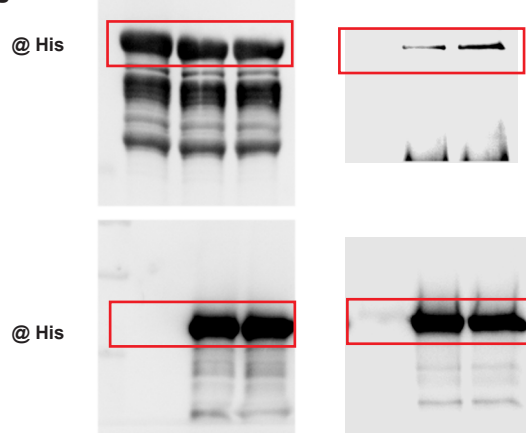**Fig 5D**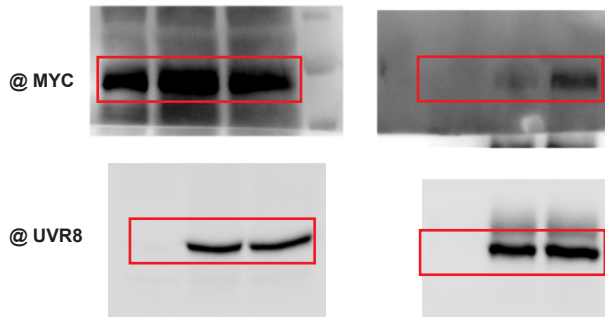**Fig 5E**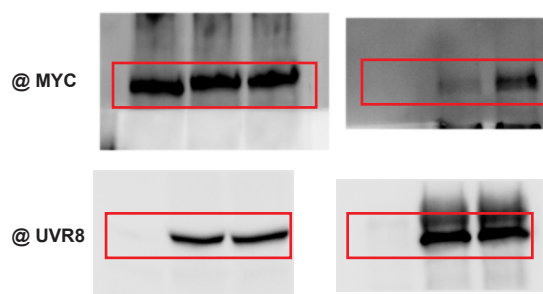**Fig 5F**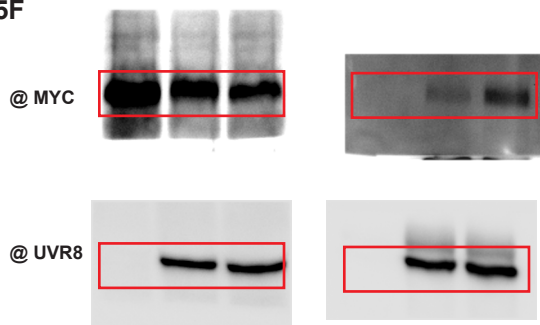**Fig 5G**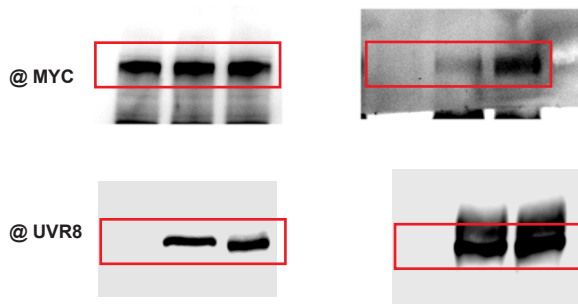

Supplement: EMBJ-39-e101928-s005.pdf [file EMBJ-39-e101928-s005.pdf]

Fig 7A

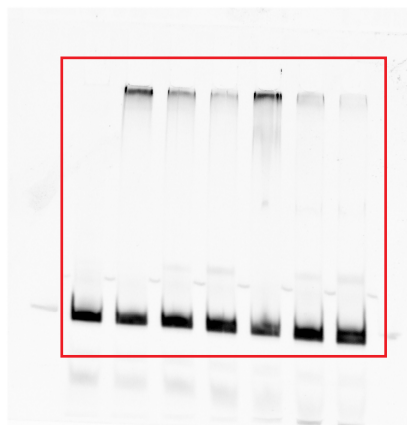

Fig 7B

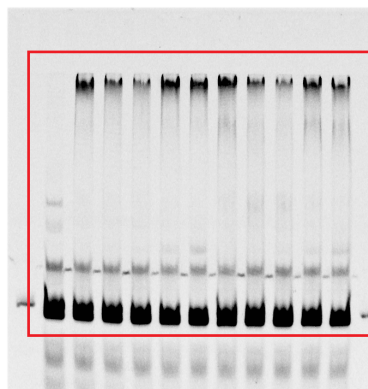

Fig 7C

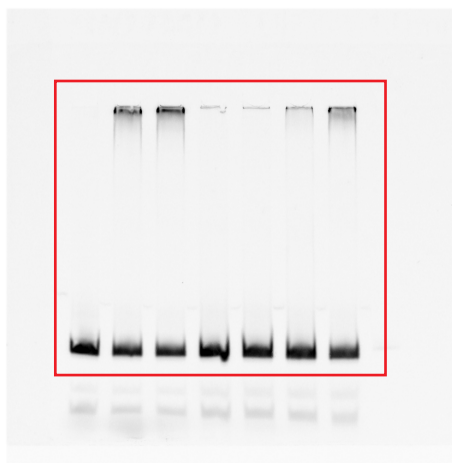

Fig 7D

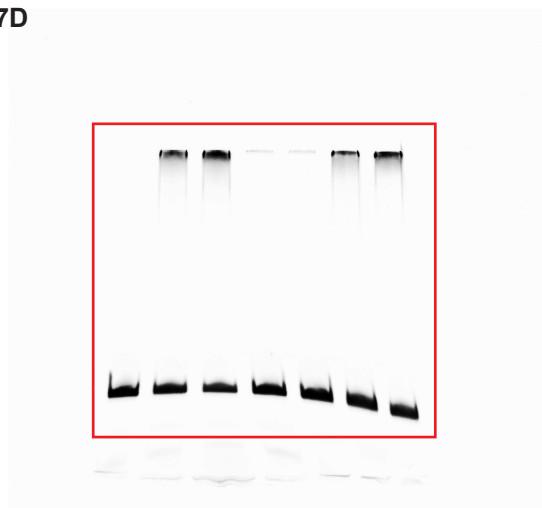

Supplement: EMBJ-39-e101928-s006.pdf [file EMBJ-39-e101928-s006.pdf]
